# Supplementary material for: Fabrication of PEGylated Fe@Bi2S3 nanocomposites for dual-mode imaging and synergistic thermoradiotherapy
Source: Royal Society of Chemistry journal article supplement (doi:10.1039/c8bm00336j), 2018-01-01
Supplement: c8bm00336j1.pdf [file c8bm00336j1.pdf]

## Supporting Information

### **Fabrication of PEGylated Fe@Bi<sub>2</sub>S<sub>3</sub> Nanocomposites for Dual-mode Imaging and Synergistic Thermoradiotherapy**

Erdong Li<sup>#a</sup>, Xiaju Cheng<sup>#b</sup>, Yaoyao Deng<sup>a</sup>, Jing Zhu<sup>a</sup>, Xiaoding Xu<sup>c</sup>, Phei Er Saw<sup>c</sup>, Hongwei Gu<sup>a</sup>, Cuicui Ge<sup>\*b</sup>, and Yue Pan<sup>\*a,c</sup>

a. State and Local Joint Engineering Laboratory for Novel Functional Polymeric Materials, College of Chemistry, Chemical Engineering and Materials Science, Soochow University, Suzhou, 215123, P.R. China.

b. State Key Laboratory of Radiation Medicine and Protection, School for Radiological and interdisciplinary Sciences (RAD-X) & Collaborative Innovation Center of Radiation Medicine of Jiangsu Higher Education Institutions, Soochow University, Suzhou 215123, P.R. China.

c. Guangdong Provincial Key Laboratory of Malignant Tumor Epigenetics and Gene Regulation, Sun Yat-Sen Memorial Hospital, Sun Yat-Sen University, Guangzhou, 510120, P.R. China.

# Equal contribution

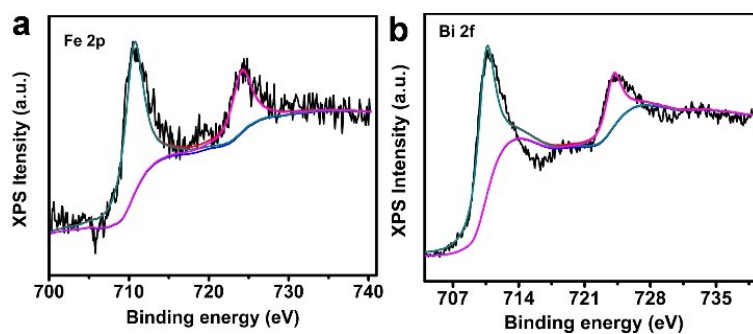

**Figure S1.** XPS spectrum overlaid with fitting curves for Fe 2p (a) and Bi 2f (b) of prepared Fe@Bi<sub>2</sub>S<sub>3</sub> nanocomposites.

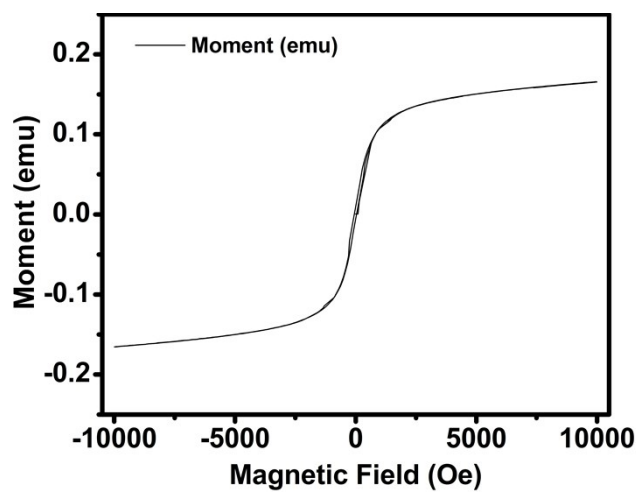

**Figure S2.** Magnetic hysteresis loop of as-prepared Fe@Bi<sub>2</sub>S<sub>3</sub> nanoparticles.

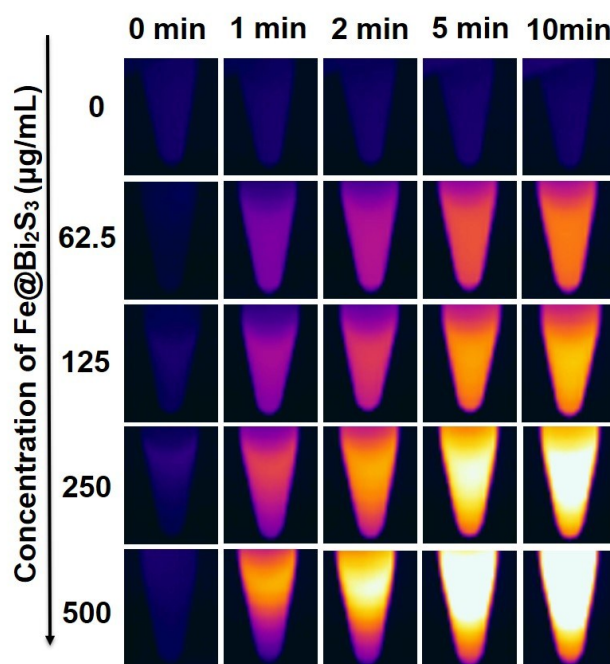

**Figure S3.** Thermal imaging photos of  $\text{Fe@Bi}_2\text{S}_3$  NPs with different concentration after irradiated by 808 nm laser for different time.

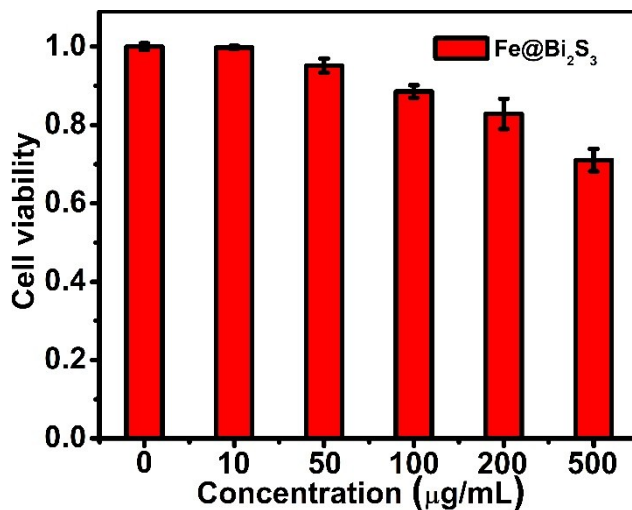

**Figure S4.** Cytotoxicity evaluated by the MTT assay in the range of 0-500 ppm of the water dispersed  $\text{Fe@Bi}_2\text{S}_3$  NPs.

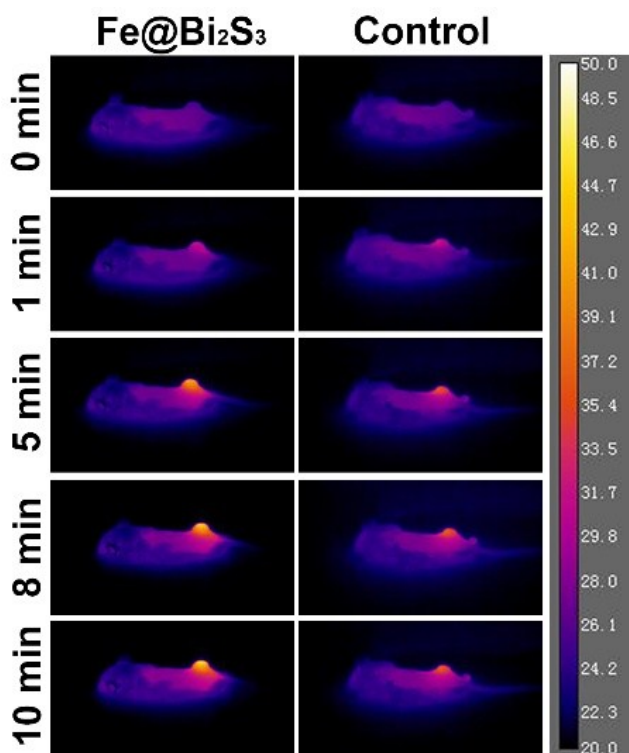

**Figure S5.** Thermal imaging pictures of mice treated with  $\text{Fe@Bi}_2\text{S}_3$  NPs and PBS after irradiated by 808 nm laser for different time.
